# Supplementary material for: Model-based evaluation of the cost effectiveness of 3 versus 6 months’ adjuvant chemotherapy in high-risk stage II colon cancer patients
Source: PubMed Central journal article supplement (PMC7502861; doi:10.1177/1756284820954114), 2020-09-16
Supplement: Appendix.pdf [file Appendix.pdf]

**Appendix Table 1.** Parameter estimates specifying transitions in the PATTERN model.

|                                       | Transition<br>Diagnosis to 90DM<br>(DIAG-90DM) | Transition<br>Diagnosis to DOC<br>(DIAG-DOC) |         | Transition<br>Diagnosis to recurrence<br>(DIAG-REC) |         | Transition<br>Recurrence to Death<br>(REC-DOC + REC-DCC) <sup>d</sup> |         | Transition<br>Recurrence to DOC<br>(REC-DOC) |
|---------------------------------------|------------------------------------------------|----------------------------------------------|---------|-----------------------------------------------------|---------|-----------------------------------------------------------------------|---------|----------------------------------------------|
| Parametric distribution               | NA                                             | Gompertz                                     |         | Gompertz                                            |         | Log Logistic                                                          |         | NA                                           |
|                                       | Probability                                    | Coefficient<br>(95%CI)                       | P-value | Coefficient<br>(95%CI)                              | P-value | Coefficient<br>(95%CI)                                                | P-value | Probability                                  |
| Shape (intercept)                     | NA                                             | 0.010 (0.009;0.012)                          | <0.01   | -0.016 (-0.021;-0.010)                              | <0.01   | 1.17 (1.06;1.29)                                                      | <0.01   | NA                                           |
| Rate / Scale                          | NA                                             | 0.000 (0.000;0.001)                          | 0.02    | 0.004 (0.003;0.005)                                 | <0.01   | 1,390 (397;4,850)                                                     | 0.48    | NA                                           |
| Age                                   |                                                |                                              |         |                                                     |         |                                                                       |         |                                              |
| ≤ 54                                  | 0.028 (0.004;0.052)                            | Reference                                    |         |                                                     |         | -3.439 (-4.363;-2.515)                                                |         | 0.000                                        |
| 55-59                                 | 0.028 (0.004;0.052)                            | 0.632 (-0.045;1,308)                         |         |                                                     |         | -3.766 (-4.778;-2.754)                                                |         | 0.001                                        |
| 60-64                                 | 0.032 (0.011;0.053)                            | 0.591 (-0.037;1,219)                         |         |                                                     |         | -4.094 (-5.194;-2.994)                                                |         | 0.001                                        |
| 65-69                                 | 0.032 (0.011;0.053)                            | 1.039 (0.453;1.624)                          |         |                                                     |         | -4.421 (-5.609;-3.233)                                                |         | 0.001                                        |
| 70-74                                 | 0.064 (0.040;0.087)                            | 1.701 (1.150;2.252)                          | <0.01   | NA                                                  | NA      | -4.749 (-6.025;-3.473)                                                | <0.01   | 0.002                                        |
| 75-79                                 | 0.073 (0.050;0.097)                            | 2.159 (1.617;2.702)                          |         |                                                     |         | -5.076 (-6.440;-3.712)                                                |         | 0.003                                        |
| 80-84                                 | 0.114 (0.081;0.147)                            | 2.823 (2.281;3.365)                          |         |                                                     |         | -5.404 (-6.856;-3.952)                                                |         | 0.004                                        |
| 85-89                                 | 0.156 (0.099;0.213)                            | 3.166 (2.604;3.729)                          |         |                                                     |         | -5.731 (-7.271;-4.191)                                                |         | 0.005                                        |
| 90-95                                 | 0.333 (0.178;0.488)                            | 3.315 (2.623;4.007)                          |         |                                                     |         | -6.059 (-7.687;-4.431)                                                |         | 0.006                                        |
| Lymph nodes evaluated<br>(≥10 vs <10) | NA                                             | NA                                           | NA      | -0.519 (-0.762;-0.276)                              | <0.01   | NA                                                                    | NA      | NA                                           |
| pT stage (pT4 vs pT3)                 | NA                                             | NA                                           | NA      | 1.081 (0.779;1.383)                                 | <0.01   | NA                                                                    | NA      | NA                                           |
| Tumor side (Left vs right)            | NA                                             | NA                                           | NA      | 0.505 (0.272;0.737)                                 | <0.01   | NA                                                                    | NA      | NA                                           |
| Biomarker subgroup                    |                                                |                                              |         |                                                     |         |                                                                       |         |                                              |
| MSI                                   |                                                |                                              |         | -1.398 <sup>a</sup> (-2.571;-0.224)                 | 0.14    |                                                                       |         |                                              |
| MSSdwt                                | NA                                             | NA                                           | NA      | -0.128 <sup>a</sup> (-1.033;0.776)                  | 1.00    | NA                                                                    | NA      | NA                                           |
| MSSmut                                |                                                |                                              |         | 0.424 <sup>a</sup> (-0.575;1.423)                   | 0.95    |                                                                       |         |                                              |
| Treatment effect                      | NA                                             | NA                                           | NA      | -0.250 <sup>a,b</sup> (-0.383;-0.118)               | <0.01   | NA                                                                    | NA      | NA                                           |
|                                       | NA                                             | NA                                           | NA      | -0.063 <sup>a,c</sup> (-0.276;0.149)                | 0.13    | NA                                                                    | NA      | NA                                           |

Abbreviations: 90DM = 90-day mortality; DIAG = diagnosis; DOC = death other causes; REC = recurrence; DCC = death of colon cancer; NA = not applicable. <sup>a</sup>Parameters used in the model are the log transformations of the estimated hazard ratios of 0.247, 0.880, 1.528, 0.779, 0.939 respectively for MSI, MSSdwt, MSSmut and treatment effect. <sup>b</sup>Treatment effect for

---

fluoropyrimidine monotherapy compared to no adjuvant chemotherapy. <sup>c</sup> Treatment effect for FOLFOX compared to Fluoropyrimidine monotherapy. <sup>d</sup> Transition REC-DOC and REC-DCC were estimated in the same parametric survival model. Transition REC-DCC is calculated as the difference of transition REC-DOC + REC-DCC and transition REC-DOC.
